# Supplementary material for: On the stability of [(uracil)2-Cu]2+ complexes in the gas phase. Different pathways for the formation of [(uracil-H)(uracil)-Cu]+ monocations
Source: Royal Society of Chemistry journal article supplement (doi:10.1039/c3ob40450a), 2013-01-01
Supplement: c3ob40450a.pdf [file c3ob40450a.pdf]

**On the stability of [(uracil)<sub>2</sub>-Cu]<sup>2+</sup> complexes in the gas phase.  
Different pathways for the formation of [(uracil-H)(uracil)-Cu]<sup>+</sup>  
monocations.**

Oriana Brea, Manuel Yáñez, Otilia Mó and Al Mokhtar Lamsabhi

*Contribution from the Departamento de Química, Facultad de Ciencias, Módulo 13,  
Campus de Excelencia UAM-CSIC, Universidad Autónoma de Madrid, Cantoblanco,  
28049-Madrid, Spain.*

**Supporting Information**  
**(A total of 5 pages)**

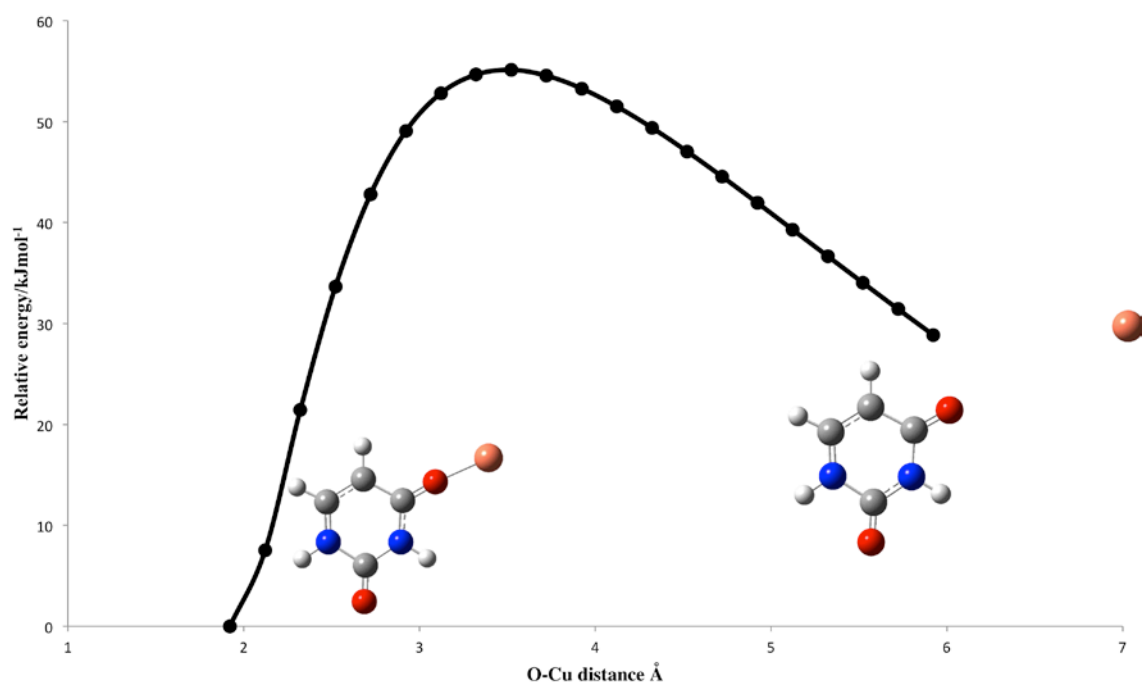

**Figure S1.** Calculated energy barrier corresponding to the  $(\text{uracil-Cu})^{2+} \rightarrow \text{uracil}^+ + \text{Cu}^+$  dissociation.

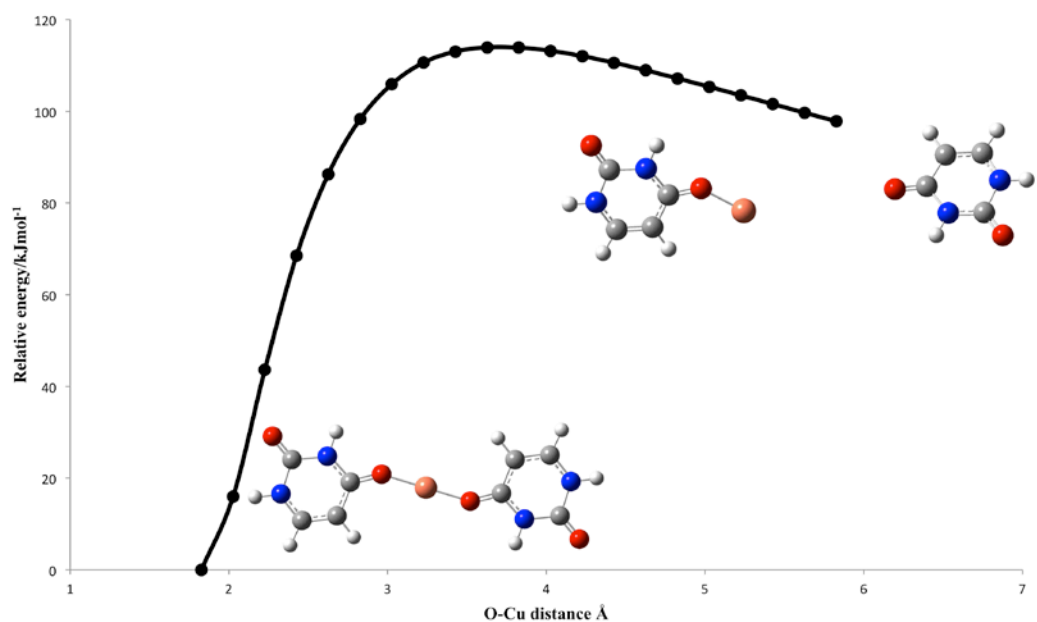

**Figure S2.** Calculated energy barrier corresponding to the  $[(\text{uracil})_2\text{-Cu}]^{2+} \rightarrow (\text{uracil-Cu})^+ + \text{uracil}^+$  dissociation.

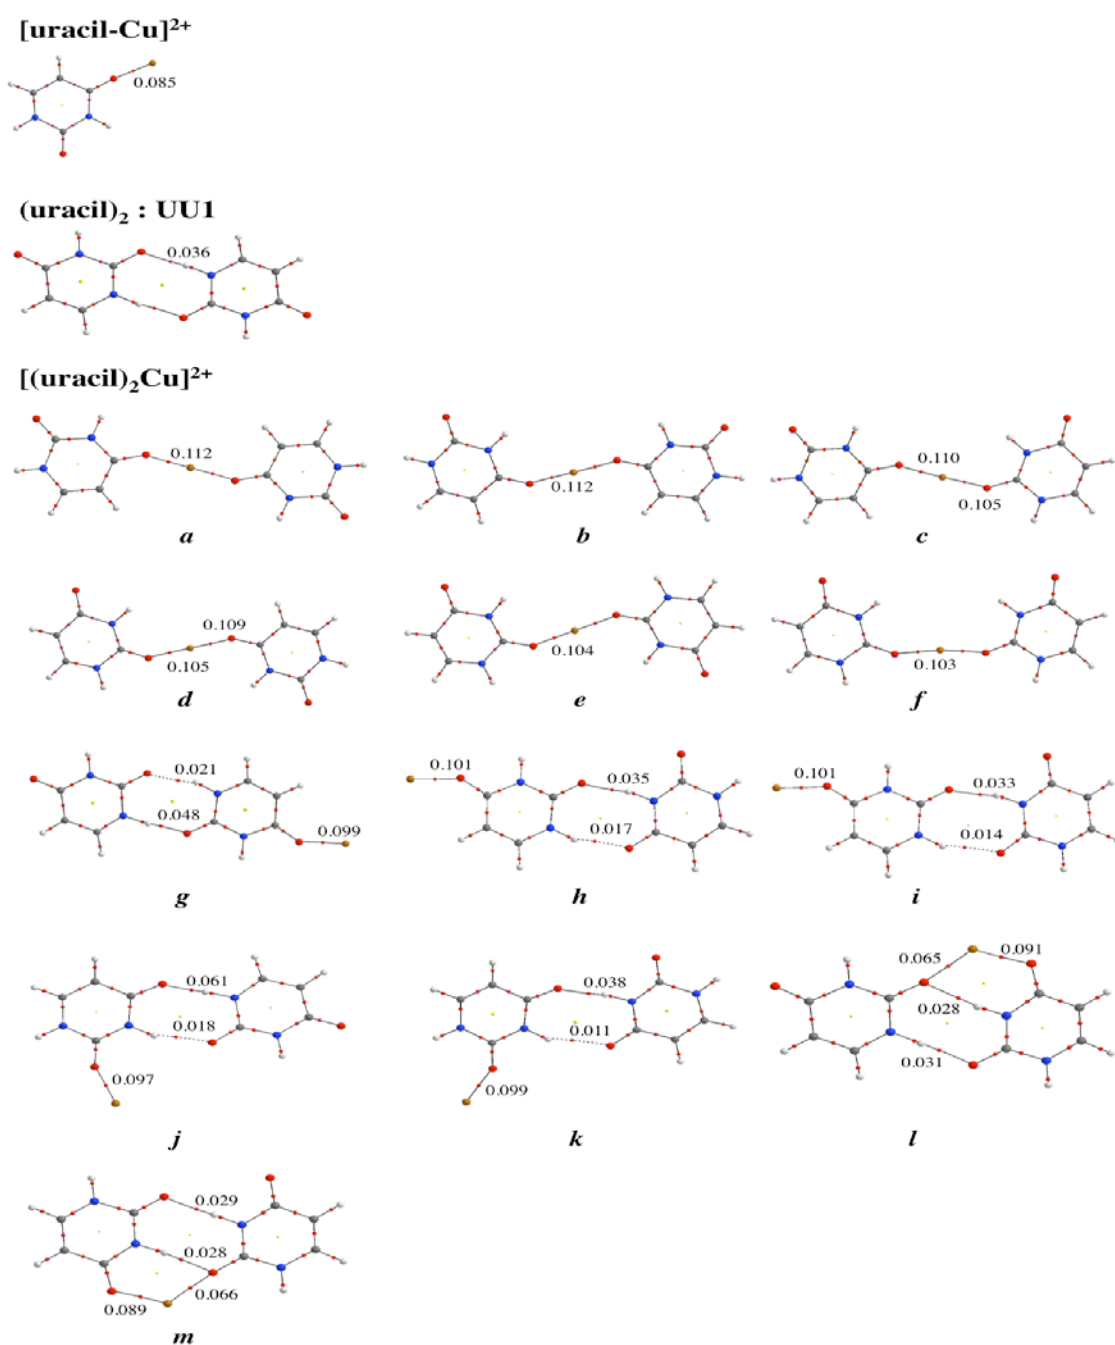

**Figure S3.** Molecular graphs for the most stable [(uracil)<sub>2</sub>Cu]<sup>2+</sup>, [(uracil)Cu]<sup>2+</sup> complexes, and (uracil)<sub>2</sub>. Red and yellow dots denote bond and ring critical points respectively. Electron densities are given in a.u.

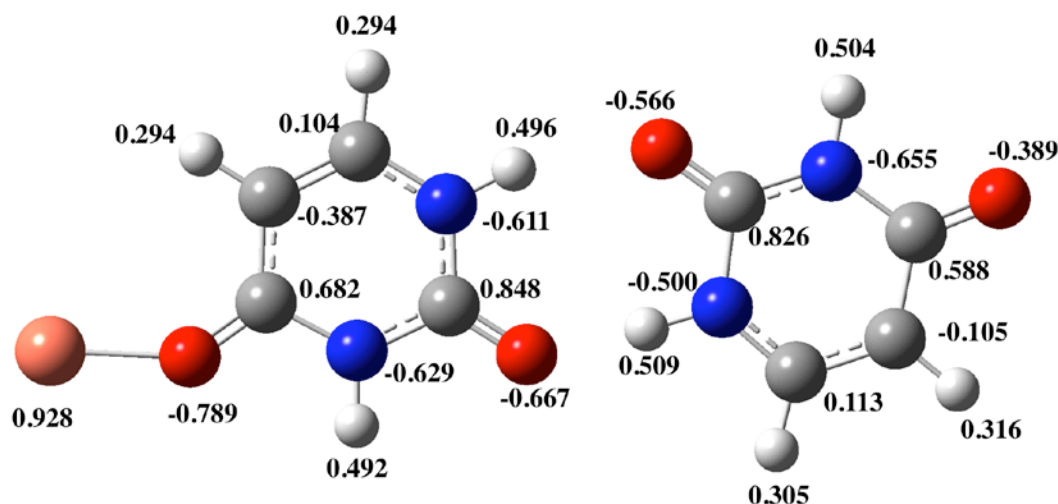

**Figure S4.** Natural net charges of the different atoms of complex **g**. The spin density is located on the uracil unit which does not interact directly with the metal.

**Table S1.** Total energies (**E**), Zero point vibrational energies (**ZPE**), Thermal corrections (298.15 K and 1 atm) to the enthalpy (**TCE**), and to the free energy (**TCG**) for the local minima of  $[(\text{uracil})_2\text{Cu}]^{2+}$  and  $[(\text{uracil})(\text{uracil-H})\text{Cu}]^+$  complexes and the transition states involved in the mechanisms shown in Figures 3, 4 and 7. All values are in hartrees.

| Complexes                                       | E         | ZPE   | TCE   | TCG   |
|-------------------------------------------------|-----------|-------|-------|-------|
| $[(\text{uracil})_2\text{Cu}]^{2+}$             |           |       |       |       |
| <i>a</i>                                        | -2469.871 | 0.176 | 0.192 | 0.128 |
| <i>b</i>                                        | -2469.870 | 0.176 | 0.192 | 0.127 |
| <i>c</i>                                        | -2469.861 | 0.176 | 0.192 | 0.126 |
| <i>d</i>                                        | -2469.861 | 0.176 | 0.192 | 0.127 |
| <i>e</i>                                        | -2469.853 | 0.175 | 0.191 | 0.126 |
| <i>f</i>                                        | -2469.852 | 0.175 | 0.191 | 0.125 |
| <i>g</i>                                        | -2469.848 | 0.175 | 0.191 | 0.127 |
| <i>h</i>                                        | -2469.846 | 0.175 | 0.191 | 0.126 |
| <i>i</i>                                        | -2469.844 | 0.175 | 0.191 | 0.126 |
| <i>j</i>                                        | -2469.838 | 0.175 | 0.191 | 0.126 |
| <i>k</i>                                        | -2469.836 | 0.175 | 0.191 | 0.125 |
| <i>l</i>                                        | -2469.833 | 0.175 | 0.191 | 0.128 |
| <i>m</i>                                        | -2469.823 | 0.175 | 0.191 | 0.128 |
| $[(\text{uracil})(\text{uracil-H})\text{Cu}]^+$ |           |       |       |       |
| (U-H)UCu(O2O4)a                                 | -2469.637 | 0.165 | 0.180 | 0.120 |
| (U-H)UCu(O4O4)b                                 | -2469.648 | 0.165 | 0.180 | 0.121 |
| (U-H)UCu(O2O4)b                                 | -2469.642 | 0.165 | 0.180 | 0.120 |
| (U-H)UCu(O2O2)b                                 | -2469.642 | 0.165 | 0.180 | 0.121 |
| Transition States                               |           |       |       |       |
| TS1                                             | -2469.801 | 0.171 | 0.187 | 0.122 |
| TS1-MA                                          | -2469.801 | 0.171 | 0.186 | 0.123 |

|               |           |       |       |       |
|---------------|-----------|-------|-------|-------|
| <b>TS1-MB</b> | -2469.791 | 0.171 | 0.186 | 0.122 |
| <b>TS2</b>    | -2469.812 | 0.173 | 0.188 | 0.126 |
| <b>TS2-MA</b> | 2469.805  | 0.172 | 0.187 | 0.124 |
| <b>TS2-MB</b> | -2469.802 | 0.172 | 0.187 | 0.124 |
| <b>TS3</b>    | -2469.613 | 0.162 | 0.176 | 0.119 |
| <b>TS4</b>    | -2469.622 | 0.164 | 0.178 | 0.122 |
| <b>TS5</b>    | -2469.628 | 0.165 | 0.178 | 0.122 |

**Table S2.** Calculated intrinsic acidity ( $\text{kJ mol}^{-1}$ ) of the N1H and N3H groups of complex **a**.

|          | <b>N1H</b> | <b>N3H</b> |
|----------|------------|------------|
| <b>a</b> | 623.0      | 671.6      |
